# Supplementary material for: Chemical and in vitro study of the potential of 3-(aryl)-2-sulfanylpropenoic acids and their Zn(ii) complexes as protective agents against cadmium toxicity
Source: Royal Society of Chemistry journal article supplement (doi:10.1039/b918361b), 2010-01-01
Supplement: b918361b.pdf [file b918361b.pdf]

## Chemical and *in vitro* study of the potential of 3-aryl-2-sulfanylpropenoic acids and their Zn(II) complexes as protective agents against cadmium toxicity †

J. S. Casas,<sup>a</sup> E. E. Castellano,<sup>b</sup> M. D. Couce,<sup>c</sup> M. García-Vega,<sup>a</sup> A. Sánchez,<sup>a</sup> A. Sánchez-González,<sup>a</sup> J. Sordo,<sup>a,\*</sup> J. M. Varela<sup>a</sup> and E. M. Vázquez López<sup>c</sup>

From the Departments of Inorganic Chemistry of the Universities of Vigo and Santiago de Compostela, Galicia, Spain; and Instituto de Física de São Carlos, Universidade de São Paulo, Brazil

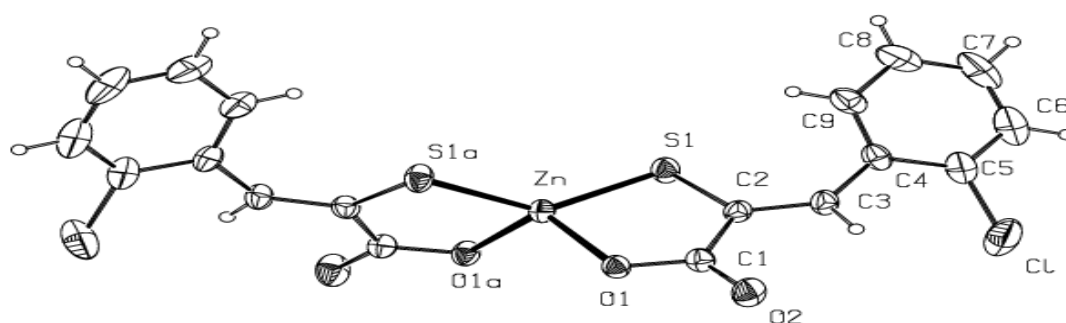

**Fig. S1.** The crystal structure and numbering scheme of the  $[\text{Zn}(\text{Clpspa})_2]^{2-}$  anion present in  $[\text{HQ}]_2[\text{Zn}(\text{Clpspa})_2]$ . Ellipsoids are drawn at the 30% probability level.

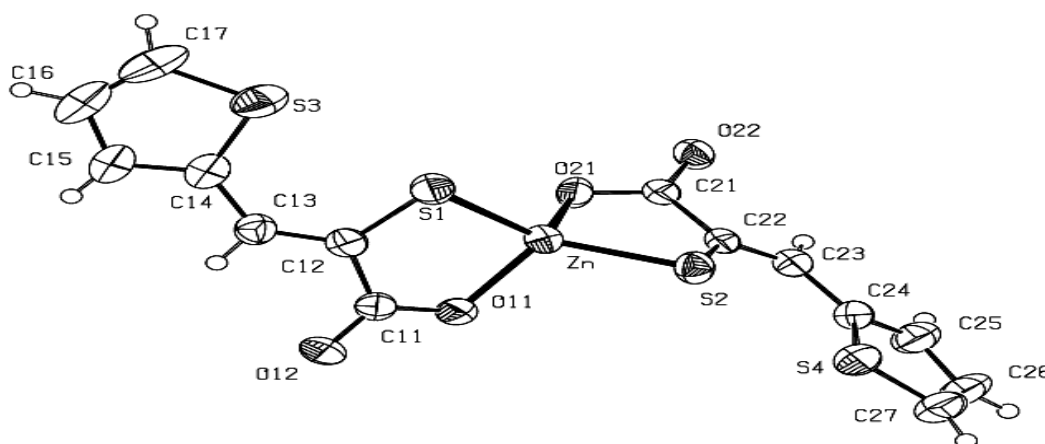

**Fig. S2.** The crystal structure and numbering scheme of the  $[\text{Zn}(\text{tspa})_2]^{2-}$  anion present in  $[\text{HQ}]_2[\text{Zn}(\text{tspa})_2]$ . Ellipsoids are drawn at the 30% probability level.

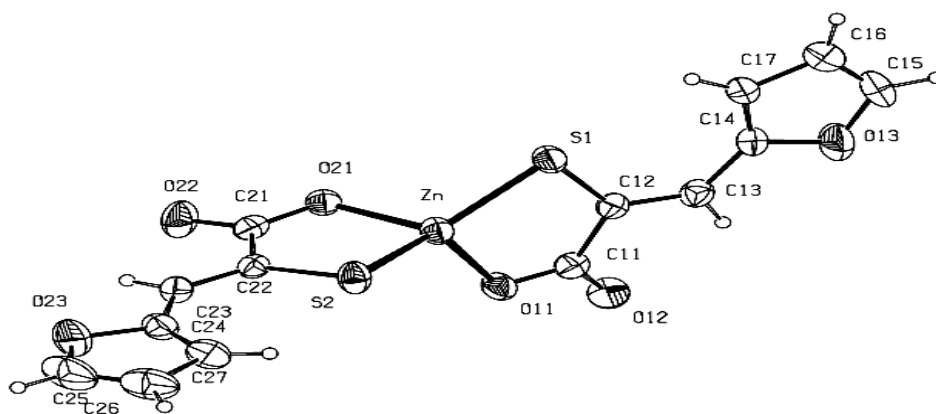

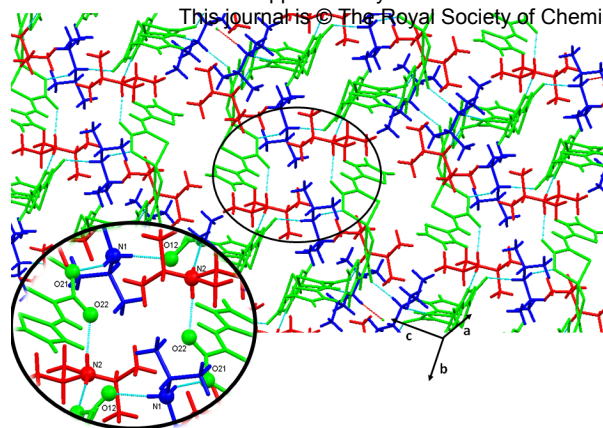

**Fig. S4.** Hydrogen bonds between the anion and the cation in [Zn(tspa)<sub>2</sub>]<sup>2-</sup>.

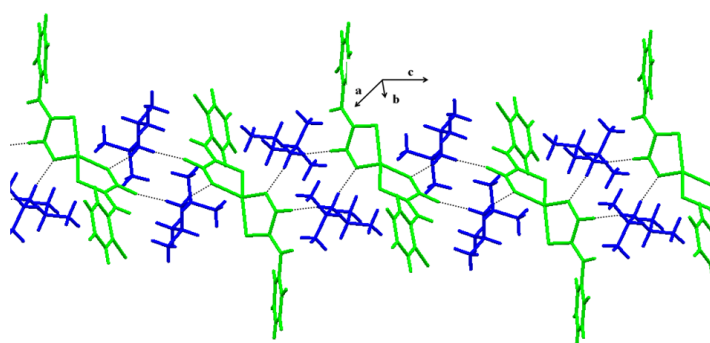

**Fig. S5.** Hydrogen bonds between the anion and the cation in [HQ]<sub>2</sub>[Zn(Clpspa)<sub>2</sub>]

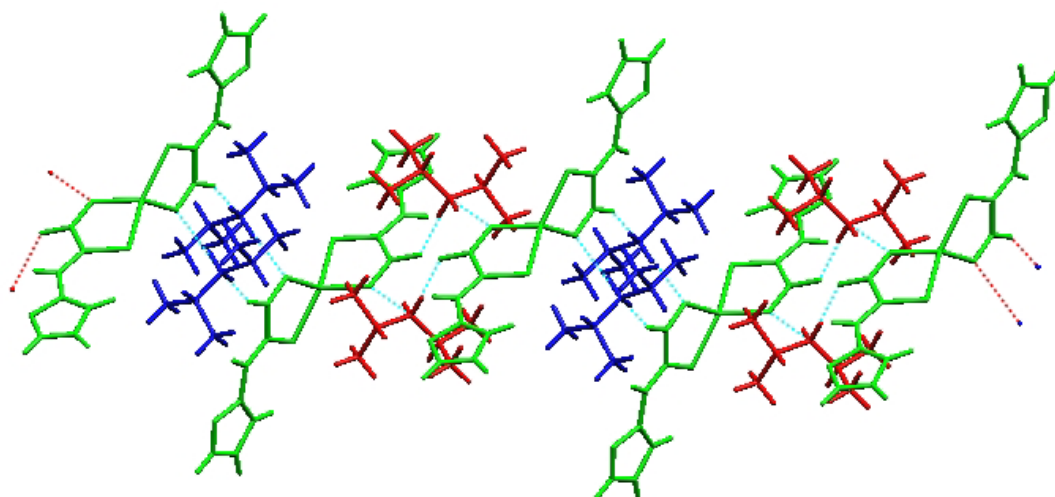

**Fig. S6.** Hydrogen bonds between the anion and the cation in [HQ]<sub>2</sub>[Zn(fspa)<sub>2</sub>]

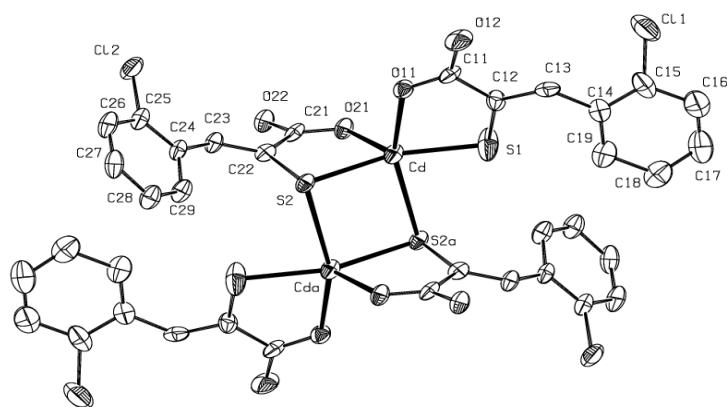

**Fig. S7.** A view of the [Cd(Clpspa)<sub>4</sub>]<sup>4-</sup> anion present in [HQ]<sub>2</sub>[Cd(Clpspa)<sub>2</sub>] showing the numbering scheme.

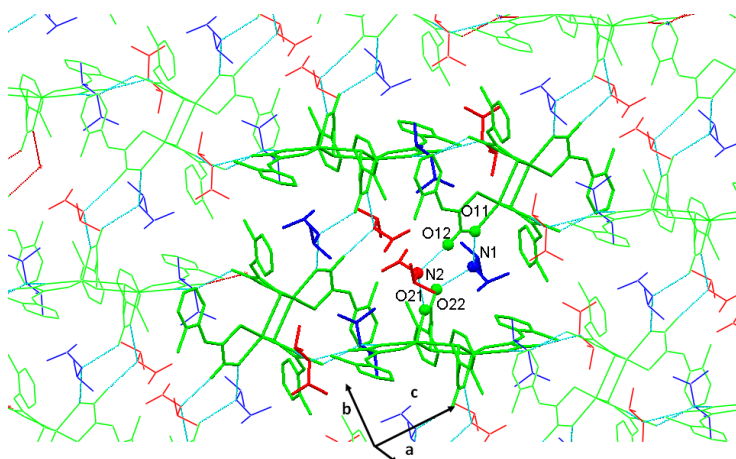

**Fig. S8.** The hydrogen bonding network in [HQ]<sub>2</sub>[Cd(Clpspa)<sub>2</sub>]. (Hydrogen atoms are omitted for clarity).
